# Supplementary material for: Detection and characterization of pancreatic and biliary tract cancers using cell-free DNA fragmentomics
Source: Springer Nature journal article supplement (doi:10.1186/s13046-024-03067-y), 2024-05-15

# Figure S1

## A

with UMI

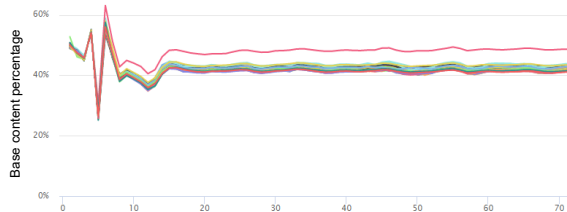

## B

without UMI

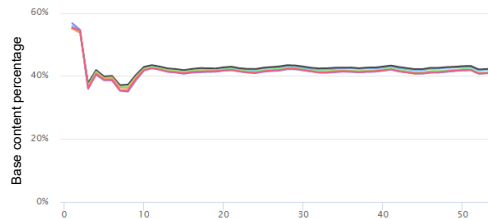

## C

SRP262262

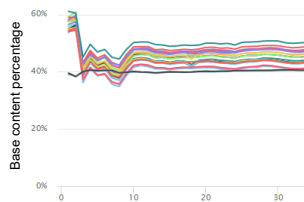

## D

GSE71378

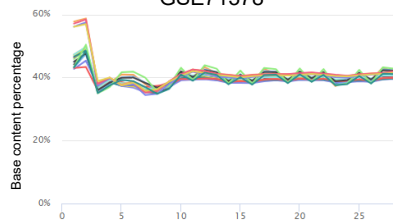

## E

SRP262262

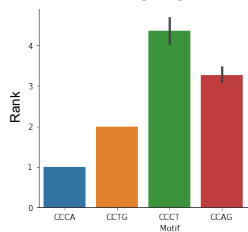

## F

GSE71378

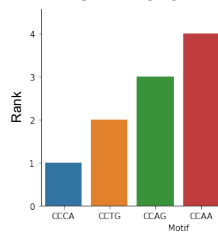

## G

with UMI  
counted from 1<sup>st</sup> bp

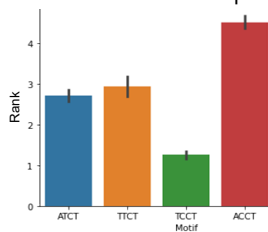

## H

with UMI  
counted from 6<sup>th</sup> bp

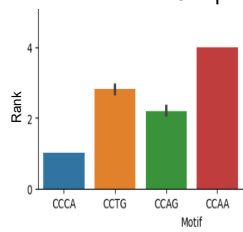

Supplement: MOESM1 [file 27095406]
