# Supplementary material for: Detection and characterization of pancreatic and biliary tract cancers using cell-free DNA fragmentomics
Source: Springer Nature journal article supplement (doi:10.1186/s13046-024-03067-y), 2024-05-15

# Figure S2

## A

Motif - 4bp

Training

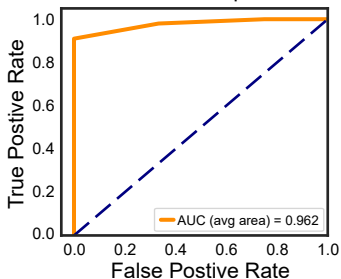

## B

Motif - 6bp

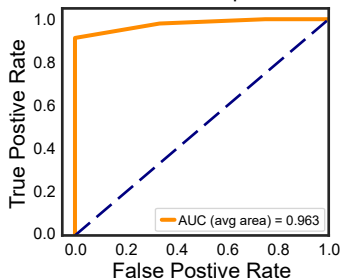

## C

Validation

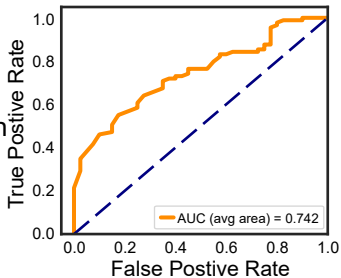

## D

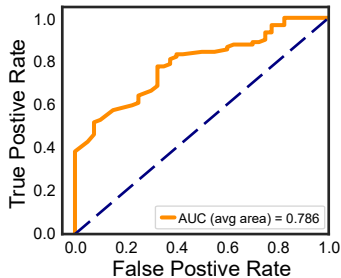

Supplement: MOESM2 [file 27095406]
