# Supplementary material for: Detection and characterization of pancreatic and biliary tract cancers using cell-free DNA fragmentomics
Source: Springer Nature journal article supplement (doi:10.1186/s13046-024-03067-y), 2024-05-15

**Figure S5**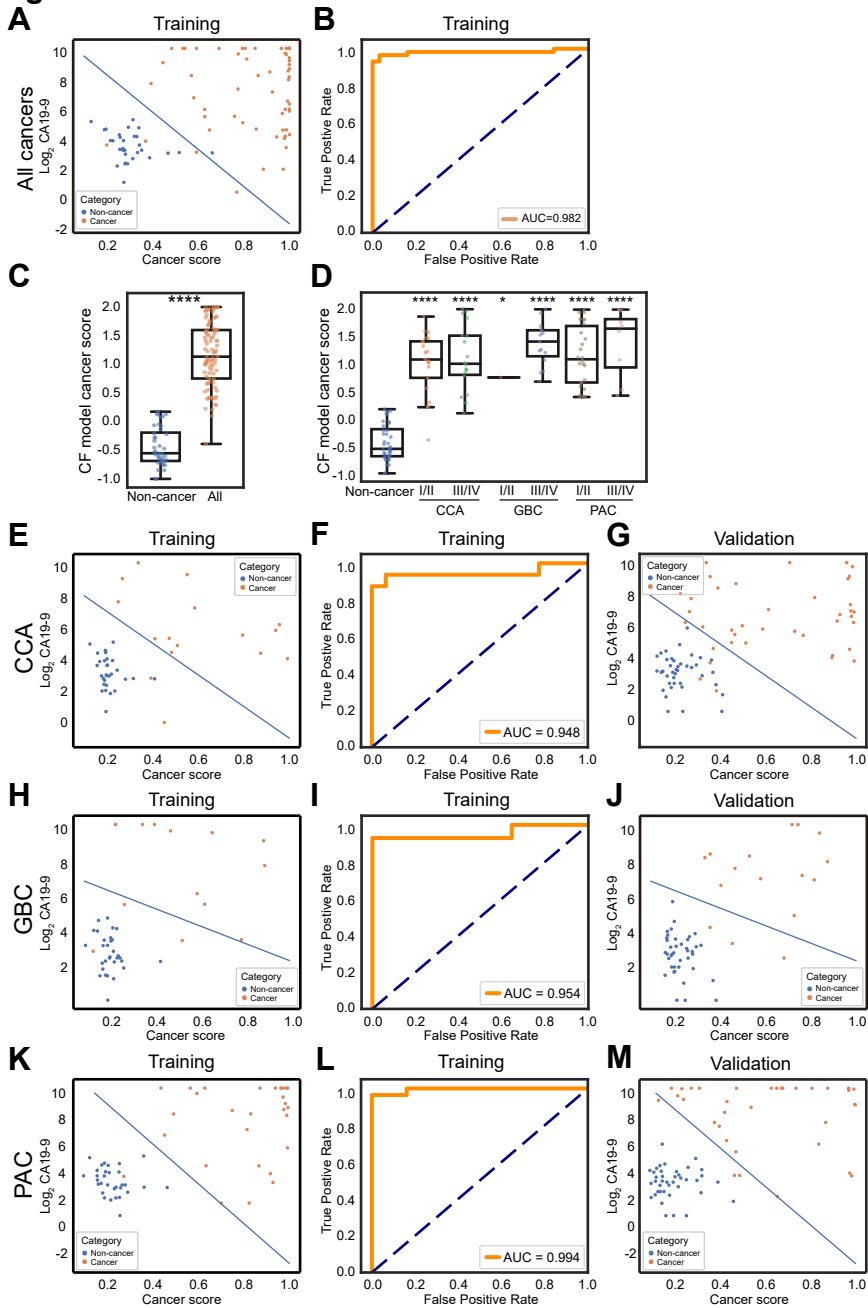

Supplement: MOESM5 [file 27095406]
